# Supplementary material for: Ameliorative effect of Kolaviron, an extract of Garcinia kola seeds, on induced hypertension
Source: publisher site journal article supplement (doi:10.1515/jcim-2020-0354), 2021-05-11
Supplement: Supplementary file 1 [file j_jcim-2020-0354_suppl.docx]

**1A**

**1B**

**1C**

Figure 1 showing Ethanol hypertensive model for Systolic Blood pressure (A), Diastolic Blood pressure (B) and Mean Arterial pressure (C). a*P*<0.05, b*P*<0.01, c*P*<0.001 vs. normal control; α*P*<0.05, β*P*<0.01, γ*P*<0.001 vs. ethanol (hypertensive control); **P*<0.05, ***P*<0.01, ****P*<0.001 vs. KV 50 mg/kg + EtOH. SBP: Systolic Blood Pressure; DBP: Diastolic Blood pressure; MAP: Mean Arterial Pressure; EtOH: Ethanol. ***(No colour printing needed).***

**2A**

**2B**

**2C**

Figure 2 showing Sucrose hypertensive model for Systolic Blood pressure (A), Diastolic Blood pressure (B) and Mean Arterial pressure (C). a*P*<0.05, b*P*<0.01, c*P*<0.001 vs. normal control; α*P*<0.05, β*P*<0.01, γ*P*<0.001 vs. ethanol (hypertensive control); **P*<0.05, ***P*<0.01, ****P*<0.001 vs. KV 50 mg/kg + EtOH. SBP: Systolic Blood Pressure; DBP: Diastolic Blood pressure; MAP: Mean Arterial Pressure. ***(No colour printing needed).***
